# Supplementary material for: Causal effects of atrial fibrillation on brain white and gray matter volume: a Mendelian randomization study
Source: Springer Nature journal article supplement (doi:10.1186/s12916-021-02152-9), 2021-11-23
Supplement: MOESM1 [file 19897632]

## Online Supplemental Material

### **Causal effect of atrial fibrillation on brain white or grey matter volume: Mendelian randomization study**

**Park et al.**

**Supplemental Methods.** The reasons that another, more recent GWAS for atrial fibrillation was not selected for the dataset implemented to develop genetic instruments.

**Supplemental Table 1.** Results of the MR analysis including overlapping samples using the 84 SNPs from the most recent GWAS meta-analysis as the genetic instruments for atrial fibrillation.

**Supplemental Table 2.** Genetic instrument for atrial fibrillation developed from the GWAS within the individuals of European ancestry.

**Supplemental Table 3.** Causal estimates from atrial fibrillation on chronic kidney disease as positive outcome in the CKDGen GWAS data.

**Supplemental Table 4.** Causal estimates from atrial fibrillation on brain grey or white matter volume of the UK Biobank participants by summary-level Mendelian randomization including palindromic SNPs.

**Supplemental Table 5.** Causal estimates from atrial fibrillation on brain grey or white matter volume of the UK Biobank participants by summary-level Mendelian randomization inferring strand information.

**Supplemental Methods.** The reasons that another, more recent GWAS for atrial fibrillation was not selected for the dataset implemented to develop genetic instruments.

The most recent GWAS for atrial fibrillation by Roselli C et al. included larger sample size and reported a larger number of SNPs associated with atrial fibrillation phenotype [1]. However, we did not use the data to develop genetic instruments for this study, because of the below critical issues.

First, the GWAS meta-analysis included the UK Biobank data, which was the outcome dataset for brain volume phenotypes in the current MR analysis. This means that the outcome data completely overlapped with the dataset used to develop genetic instruments, similarly as a one-sample MR analysis which is different from the current two-sample MR analysis. It is well known that such MR analysis with overlapping samples can be biased towards observational findings. In addition, the previous literature identified that such MR analysis would be invalid for an outcome dataset with a sample size lower than 100,000 individuals [2]. Considering that the current outcome brain volume phenotypes were measured in 33,244 individuals, allowing the complete overlap would lead to critical bias.

Second, increasing the number of genetic variants to explain a phenotype is not always helpful to increase instrumental power. Considering the calculation of F statistics, including SNPs that are not contributing a large portion to the variance explained would even decrease the instrumental power [3]. Therefore, including a larger number of SNPs but also some weak variants would decrease the instrumental power, which causes a critical bias towards observational findings particularly for an MR analysis including overlapping samples.

Third, increasing wider ranges of SNPs has some weakness if weakly associated variants are included, as pleiotropic SNPs that are tightly bound to confounding phenotypes but weakly to the exposure phenotype of interest may be present. Different from our main MR analysis, if we use the 84 SNPs from the largest and most recent GWAS (results from the European ancestry-specific analysis) as the genetic instruments for atrial fibrillation [1], the MR-Egger regression intercept P value, which is a former test to suspect a pleiotropic effect, indicated that some directional pleiotropic effect was present.

Fourth, the result made us to suspect that the overall issues led to a bias in the causal estimates, as the causal estimates from the MR-Egger regression, correcting such pleiotropic effect, and other MR analysis were different. The pleiotropy-robust MR analysis results indicated the significant causal effect from atrial fibrillation on brain volume phenotypes, however, the main causal estimates by the inverse-variance weighted method were null, which further raised suspicion for the bias by pleiotropic effect or issues related to weak instruments (Supplemental Table 1). Also, the weighted median method provided marginal findings, thus, for conclusive results, we required the different instruments with clear-cut results.

Therefore, we used the previous GWAS to secure the two-sample MR analysis setting, which is more conservative because even a potential bias from weak instruments is present the direction would be towards a false-negative result. Namely, a positive finding from a two-sample MR is more likely to reflect the presence of a true causal effect. In addition, the instrumental power was secured, a potential directional pleiotropic effect was not present for the main findings considering the MR-Egger intercept P values, and the main MR analysis and pleiotropy-robust methods provided consistent findings.

[1] Roselli C, Chaffin MD, Weng LC, Aeschbacher S, Ahlberg G, Albert CM, Almgren P, Alonso A, Anderson CD, Aragam KG et al: Multi-ethnic genome-wide association study for atrial fibrillation. *Nat Genet* 2018, 50(9):1225-1233.

[2] Minelli C, Del Greco MF, van der Plaats DA, et al. The use of two-sample methods for Mendelian randomization analyses on single large datasets. *Int J Epidemiol* 2021 doi: 10.1093/ije/dyab084 [published Online First: 2021/04/27]

[3] Burgess S, Thompson SG; CRP CHD Genetics Collaboration. Avoiding bias from weak instruments in Mendelian randomization studies. *Int J Epidemiol*. 2011;40(3):755-764. doi:10.1093/ije/dyr036

**Supplemental Table 1.** Results of the MR analysis including overlapping samples using the 84 SNPs from the most recent GWAS meta-analysis as the genetic instruments for atrial fibrillation.

| Genetically predicted exposure     | Outcome phenotype                 | MR-Egger intercept P value | Cochran's statistics Q P value for heterogeneity | MR method            | beta   | standard error | P value |
|------------------------------------|-----------------------------------|----------------------------|--------------------------------------------------|----------------------|--------|----------------|---------|
| Atrial fibrillation (84 SNPs)      | Grey matter volume (normalised)   | 0.230                      | < 0.001                                          | IVW                  | -0.013 | 0.017          | 0.446   |
|                                    |                                   |                            |                                                  | MR-Egger (bootstrap) | -0.068 | 0.025          | 0.006   |
|                                    |                                   |                            |                                                  | Weighted median      | -0.040 | 0.021          | 0.059   |
|                                    |                                   |                            |                                                  | MR-RAPS              | -0.019 | 0.017          | 0.256   |
|                                    |                                   |                            |                                                  | MR-PRESSO            | -0.025 | 0.014          | 0.081   |
|                                    | Grey matter volume (unnormalised) | 0.204                      | < 0.001                                          | IVW                  | -0.013 | 0.017          | 0.423   |
|                                    |                                   |                            |                                                  | MR-Egger (bootstrap) | -0.070 | 0.025          | 0.001   |
|                                    |                                   |                            |                                                  | Weighted median      | -0.043 | 0.022          | 0.053   |
|                                    |                                   |                            |                                                  | MR-RAPS              | -0.019 | 0.017          | 0.254   |
|                                    |                                   |                            |                                                  | MR-PRESSO            | -0.026 | 0.014          | 0.073   |
|                                    | White matter volume (normalised)  | 0.025                      | < 0.001                                          | IVW                  | -0.004 | 0.016          | 0.776   |
|                                    |                                   |                            |                                                  | MR-Egger (bootstrap) | -0.042 | 0.024          | 0.042   |
|                                    |                                   |                            |                                                  | Weighted median      | -0.035 | 0.022          | 0.115   |
|                                    |                                   |                            |                                                  | MR-RAPS              | -0.013 | 0.015          | 0.387   |
|                                    |                                   |                            |                                                  | MR-PRESSO            | -0.016 | 0.013          | 0.251   |
| White matter volume (unnormalised) | 0.024                             | < 0.001                    | IVW                                              | -0.004               | 0.016  | 0.793          |         |
|                                    |                                   |                            | MR-Egger (bootstrap)                             | -0.041               | 0.025  | 0.046          |         |
|                                    |                                   |                            | Weighted median                                  | -0.034               | 0.021  | 0.110          |         |
|                                    |                                   |                            | MR-RAPS                                          | -0.013               | 0.015  | 0.402          |         |
|                                    |                                   |                            | MR-PRESSO                                        | -0.012               | 0.014  | 0.396          |         |

MR = Mendelian randomization, IVW = Inverse variance weighted, RAPS = Robust Adjusted Profile Score, PRESSO = Pleiotropy Residual Sum and Outlier

The unit of causal estimates were from a Z-score unit (atrial fibrillation) towards a standard deviation (brain volume).

Supplemental Table 2. Genetic instrument for atrial fibrillation developed from the GWAS within the individuals of European ancestry.

| Bais information |               |              | Variant filter         |             | Exposure association |       |           | Potential confounder association |       |          |              |       |          |              |       |          |         |       |          | Outcome association |       |          |                            |                                 |       |          |                                   |       |          |                                  |       | Ischemic stroke association |                                    |       |          |         |        |          |
|------------------|---------------|--------------|------------------------|-------------|----------------------|-------|-----------|----------------------------------|-------|----------|--------------|-------|----------|--------------|-------|----------|---------|-------|----------|---------------------|-------|----------|----------------------------|---------------------------------|-------|----------|-----------------------------------|-------|----------|----------------------------------|-------|-----------------------------|------------------------------------|-------|----------|---------|--------|----------|
| RSID             | effect allele | other allele | Linkage disequilibrium | Palindromic | beta                 | SE    | P         | Diabetes mellitus                |       |          | Dyslipidemia |       |          | Hypertension |       |          | Obesity |       |          | Thyroid disease     |       |          | Lowest P with a confounder | Grey matter volume (normalised) |       |          | Grey matter volume (unnormalised) |       |          | White matter volume (normalised) |       |                             | White matter volume (unnormalised) |       |          |         |        |          |
|                  |               |              |                        |             |                      |       |           | OR                               | SE    | P        | OR           | SE    | P        | OR           | SE    | P        | OR      | SE    | P        | OR                  | SE    | P        |                            | OR                              | SE    | P        | OR                                | SE    | P        | OR                               | SE    | P                           | OR                                 | SE    | P        | OR      | SE     | P        |
| rs10800507       | C             | G            | TRUE, rs651386         | TRUE        | 0.086                | 0.014 | 1.87E-11  | 0.997                            | 0.012 | 8.17E-01 | 1.008        | 0.007 | 2.19E-01 | 1.006        | 0.006 | 3.58E-01 | 0.999   | 0.006 | 8.42E-01 | 1.006               | 0.011 | 5.89E-01 | 2.19E-01                   | 0.010                           | 0.008 | 2.06E-01 | 0.010                             | 0.008 | 2.14E-01 | -0.009                           | 0.008 | 2.69E-01                    | -0.008                             | 0.008 | 2.82E-01 | 0.0142  | 0.0102 | 0.1656   |
| rs10824026       | A             | G            |                        |             | 0.122                | 0.018 | 8.29E-11  | 1.024                            | 0.016 | 1.39E-01 | 0.999        | 0.010 | 8.76E-01 | 0.979        | 0.009 | 1.42E-02 | 1.019   | 0.008 | 1.80E-02 | 1.007               | 0.016 | 6.79E-01 | 1.42E-02                   | -0.010                          | 0.011 | 3.39E-01 | -0.010                            | 0.011 | 3.37E-01 | -0.001                           | 0.011 | 8.99E-01                    | -0.001                             | 0.011 | 9.31E-01 | 0.0055  | 0.0141 | 0.6951   |
| rs11264280       | T             | C            |                        |             | 0.122                | 0.014 | 2.77E-17  | 0.983                            | 0.012 | 1.63E-01 | 0.997        | 0.007 | 6.37E-01 | 0.994        | 0.007 | 4.06E-01 | 1.017   | 0.006 | 5.49E-03 | 1.017               | 0.012 | 1.74E-01 | 5.49E-03                   | -0.012                          | 0.008 | 1.35E-01 | -0.014                            | 0.008 | 9.66E-02 | -0.006                           | 0.008 | 4.63E-01                    | -0.006                             | 0.008 | 4.64E-01 | -0.0012 | 0.0109 | 0.9148   |
| rs11598047       | G             | A            |                        |             | 0.166                | 0.017 | 3.16E-21  | 0.993                            | 0.016 | 6.58E-01 | 0.999        | 0.010 | 8.97E-01 | 1.004        | 0.009 | 6.66E-01 | 0.979   | 0.008 | 9.21E-03 | 1.002               | 0.016 | 9.03E-01 | 9.21E-03                   | 0.002                           | 0.011 | 8.83E-01 | 0.002                             | 0.011 | 8.65E-01 | 0.010                            | 0.011 | 3.71E-01                    | 0.010                              | 0.011 | 3.43E-01 | 0.018   | 0.0135 | 0.1826   |
| rs11773845       | A             | C            |                        |             | 0.095                | 0.014 | 3.35E-13  | 0.987                            | 0.012 | 2.79E-01 | 1.008        | 0.007 | 2.78E-01 | 0.995        | 0.006 | 4.34E-01 | 0.992   | 0.006 | 1.57E-01 | 0.995               | 0.012 | 6.60E-01 | 1.57E-01                   | -0.011                          | 0.008 | 1.78E-01 | -0.011                            | 0.008 | 1.74E-01 | -0.007                           | 0.008 | 3.74E-01                    | -0.007                             | 0.008 | 3.61E-01 | 0.0133  | 0.0101 | 0.1897   |
| rs12664873       | T             | G            |                        |             | 0.077                | 0.016 | 1.80E-08  | 1.001                            | 0.013 | 9.19E-01 | 1.006        | 0.007 | 4.34E-01 | 0.993        | 0.007 | 2.73E-01 | 1.003   | 0.006 | 6.63E-01 | 0.992               | 0.012 | 5.13E-01 | 2.73E-01                   | -0.010                          | 0.008 | 2.22E-01 | -0.010                            | 0.008 | 2.27E-01 | 0.009                            | 0.008 | 2.79E-01                    | 0.009                              | 0.008 | 2.82E-01 | 0.0071  | 0.0111 | 0.5242   |
| rs2106261        | T             | C            |                        |             | 0.174                | 0.017 | 4.01E-24  | 0.981                            | 0.015 | 2.07E-01 | 1.001        | 0.009 | 9.20E-01 | 0.982        | 0.008 | 2.74E-02 | 0.988   | 0.008 | 1.27E-01 | 1.023               | 0.015 | 1.39E-01 | 2.74E-02                   | -0.010                          | 0.010 | 3.20E-01 | -0.010                            | 0.010 | 3.17E-01 | 0.004                            | 0.010 | 6.93E-01                    | 0.005                              | 0.010 | 6.48E-01 | 0.0493  | 0.013  | 0.000157 |
| rs2129977        | A             | G            |                        |             | 0.372                | 0.014 | 7.25E-136 | 0.968                            | 0.015 | 2.89E-02 | 1.007        | 0.009 | 3.89E-01 | 1.014        | 0.008 | 8.71E-02 | 1.008   | 0.007 | 2.57E-01 | 1.027               | 0.014 | 6.55E-02 | 2.89E-02                   | -0.016                          | 0.010 | 1.09E-01 | -0.017                            | 0.010 | 7.97E-02 | -0.013                           | 0.010 | 1.81E-01                    | -0.014                             | 0.010 | 1.67E-01 | 0.091   | 0.0119 | 2.65E-14 |
| rs2723064        | T             | C            |                        |             | 0.086                | 0.014 | 1.88E-10  | 1.042                            | 0.012 | 5.29E-04 | 1.014        | 0.007 | 4.51E-02 | 1.025        | 0.006 | 1.24E-04 | 1.008   | 0.006 | 2.03E-01 | 1.003               | 0.012 | 8.04E-01 | 1.24E-04                   | -0.011                          | 0.008 | 1.72E-01 | -0.010                            | 0.008 | 1.92E-01 | 0.014                            | 0.008 | 8.54E-02                    | 0.014                              | 0.008 | 7.96E-02 | 0.0212  | 0.01   | 0.03445  |
| rs281868         | G             | A            |                        |             | 0.077                | 0.012 | 1.03E-08  | 0.975                            | 0.011 | 3.06E-02 | 0.997        | 0.007 | 6.10E-01 | 1.012        | 0.006 | 6.52E-02 | 0.991   | 0.006 | 1.26E-01 | 1.000               | 0.011 | 9.84E-01 | 3.06E-02                   | 0.013                           | 0.008 | 8.29E-02 | 0.014                             | 0.008 | 7.45E-02 | 0.006                            | 0.008 | 4.51E-01                    | 0.006                              | 0.008 | 4.69E-01 | 0.0014  | 0.01   | 0.8871   |
| rs2921421        | G             | C            |                        | TRUE        | 0.542                | 0.099 | 3.29E-08  | 1.113                            | 0.168 | 5.26E-01 | 1.124        | 0.101 | 2.48E-01 | 1.020        | 0.096 | 8.36E-01 | 0.945   | 0.088 | 5.19E-01 | 1.092               | 0.169 | 6.02E-01 | 2.48E-01                   | 0.145                           | 0.120 | 2.27E-01 | 0.152                             | 0.120 | 2.06E-01 | 0.103                            | 0.120 | 3.92E-01                    | 0.110                              | 0.120 | 3.60E-01 | NA      | NA     | NA       |
| rs35176054       | A             | T            | TRUE, rs11598047       | TRUE        | 0.131                | 0.018 | 1.75E-11  | 0.995                            | 0.018 | 7.63E-01 | 0.996        | 0.010 | 6.83E-01 | 1.009        | 0.010 | 3.40E-01 | 0.990   | 0.009 | 2.51E-01 | 0.996               | 0.018 | 8.33E-01 | 2.51E-01                   | 0.015                           | 0.012 | 2.06E-01 | 0.016                             | 0.012 | 1.84E-01 | 0.007                            | 0.012 | 5.34E-01                    | 0.007                              | 0.012 | 5.58E-01 | 0.0173  | 0.014  | 0.2167   |
| rs62133983       | G             | T            |                        |             | 0.086                | 0.014 | 1.36E-10  | 1.008                            | 0.012 | 4.88E-01 | 1.003        | 0.007 | 6.12E-01 | 0.994        | 0.006 | 3.66E-01 | 0.994   | 0.006 | 2.75E-01 | 1.005               | 0.011 | 6.52E-01 | 2.75E-01                   | 0.006                           | 0.008 | 4.62E-01 | 0.006                             | 0.008 | 4.43E-01 | 0.009                            | 0.008 | 2.57E-01                    | 0.009                              | 0.008 | 2.28E-01 | -0.0114 | 0.0099 | 0.2508   |
| rs651386         | A             | T            |                        | TRUE        | 0.104                | 0.014 | 6.23E-15  | 1.010                            | 0.012 | 3.95E-01 | 1.003        | 0.007 | 7.09E-01 | 1.004        | 0.006 | 4.83E-01 | 0.997   | 0.006 | 5.61E-01 | 1.018               | 0.012 | 1.14E-01 | 1.14E-01                   | -0.005                          | 0.008 | 5.26E-01 | -0.005                            | 0.008 | 5.14E-01 | -0.006                           | 0.008 | 4.74E-01                    | -0.006                             | 0.008 | 4.60E-01 | 0.0163  | 0.01   | 0.1037   |
| rs6864727        | C             | T            |                        |             | 0.077                | 0.014 | 1.12E-08  | 0.988                            | 0.012 | 3.47E-01 | 1.000        | 0.007 | 9.68E-01 | 1.003        | 0.007 | 7.11E-01 | 1.007   | 0.006 | 2.77E-01 | 1.029               | 0.012 | 1.83E-02 | 1.83E-02                   | -0.012                          | 0.008 | 1.63E-01 | -0.011                            | 0.008 | 1.78E-01 | -0.017                           | 0.008 | 4.19E-02                    | -0.017                             | 0.008 | 3.71E-02 | 0.0153  | 0.0107 | 0.152    |
| rs7026071        | T             | C            |                        |             | 0.086                | 0.012 | 2.86E-11  | 0.999                            | 0.012 | 9.18E-01 | 1.007        | 0.007 | 3.03E-01 | 1.005        | 0.006 | 4.44E-01 | 1.001   | 0.006 | 8.68E-01 | 0.996               | 0.012 | 7.32E-01 | 3.03E-01                   | 0.001                           | 0.008 | 9.49E-01 | 0.002                             | 0.008 | 8.11E-01 | -0.020                           | 0.008 | 1.08E-02                    | -0.021                             | 0.008 | 8.85E-03 | 0.0138  | 0.0101 | 0.1701   |
| rs7183206        | A             | G            |                        |             | 0.122                | 0.020 | 7.70E-12  | 0.970                            | 0.017 | 6.77E-02 | 0.985        | 0.010 | 1.29E-01 | 0.974        | 0.009 | 3.85E-03 | 0.983   | 0.008 | 3.54E-02 | 0.991               | 0.017 | 5.82E-01 | 3.85E-03                   | -0.010                          | 0.011 | 3.60E-01 | -0.010                            | 0.011 | 3.61E-01 | -0.018                           | 0.011 | 1.14E-01                    | -0.017                             | 0.011 | 1.41E-01 | 0.0287  | 0.0146 | 0.0499   |
| rs7508           | A             | G            |                        |             | 0.095                | 0.016 | 6.34E-10  | 1.009                            | 0.013 | 5.00E-01 | 1.017        | 0.008 | 2.30E-02 | 0.996        | 0.007 | 5.24E-01 | 0.996   | 0.006 | 5.37E-01 | 1.029               | 0.013 | 2.82E-02 | 2.30E-02                   | -0.008                          | 0.009 | 3.84E-01 | -0.006                            | 0.009 | 5.10E-01 | 0.011                            | 0.009 | 1.86E-01                    | 0.011                              | 0.009 | 1.88E-01 | 0.0183  | 0.0113 | 0.1055   |
| rs75190942       | A             | C            |                        |             | 0.166                | 0.030 | 2.82E-08  | 0.988                            | 0.020 | 5.50E-01 | 0.998        | 0.012 | 8.58E-01 | 0.979        | 0.011 | 4.93E-02 | 1.011   | 0.010 | 2.54E-01 | 0.991               | 0.020 | 6.54E-01 | 4.93E-02                   | -0.009                          | 0.014 | 5.28E-01 | -0.009                            | 0.014 | 5.16E-01 | -0.010                           | 0.014 | 4.55E-01                    | -0.012                             | 0.014 | 4.02E-01 | 0.0427  | 0.02   | 0.03246  |
| rs883079         | T             | C            |                        |             | 0.104                | 0.016 | 1.31E-13  | 1.006                            | 0.013 | 6.67E-01 | 1.016        | 0.008 | 4.15E-02 | 0.999        | 0.007 | 8.65E-01 | 0.999   | 0.006 | 8.76E-01 | 1.005               | 0.013 | 6.81E-01 | 4.15E-02                   | 0.003                           | 0.009 | 7.08E-01 | 0.003                             | 0.009 | 6.96E-01 | 0.004                            | 0.009 | 6.60E-01                    | 0.004                              | 0.009 | 6.37E-01 | 0.0291  | 0.0111 | 0.008929 |

OR = odds ratio, SE = standard ratio  
 Linkage disequilibrium was identified by applying threshold of r2 < 0.001 within 1 Mb-window.

**Supplemental Table 3.** Causal estimates from atrial filtration on chronic kidney disease as positive outcome in the CKDGen GWAS data.

| Genetically predicted exposure | Outcome phenotype      | MR-Egger intercept P value | Cochran's statistics Q P value for heterogeneity | MR method            | beta  | standard error | P value |
|--------------------------------|------------------------|----------------------------|--------------------------------------------------|----------------------|-------|----------------|---------|
| Atrial fibrillation (16 SNPs)  | Chronic kidney disease | 0.731                      | 0.033                                            | IVW                  | 0.066 | 0.026          | 0.012   |
|                                |                        |                            |                                                  | MR-Egger (bootstrap) | 0.107 | 0.043          | 0.004   |
|                                |                        |                            |                                                  | Weighted median      | 0.080 | 0.027          | 0.003   |
|                                |                        |                            |                                                  | MR-RAPS              | 0.071 | 0.029          | 0.013   |
|                                |                        |                            |                                                  | MR-PRESSO            | NA    | NA             | NA      |

MR = Mendelian randomization, IVW = Inverse variance weighted, RAPS = Robust Adjusted Profile Score, PRESSO = Pleiotropy Residual Sum and Outlier

MR-PRESSO analysis was performed but as MR-PRESSO global test for heterogeneity did not identify correctable effects from outliers.

The unit of causal estimates were from a log odds ratio (atrial fibrillation) towards a log odds ratio (chronic kidney disease) or log-estimated glomerular filtration rate.

**Supplemental Table 4.** Causal estimates from atrial fibrillation on brain grey or white matter volume of the UK Biobank participants by summary-level Mendelian randomization including palindromic SNPs.

| Genetically predicted exposure | Outcome phenotype                  | MR-Egger intercept P value | Cochran's statistics Q P value for heterogeneity | MR method            | beta   | standard error | P value |
|--------------------------------|------------------------------------|----------------------------|--------------------------------------------------|----------------------|--------|----------------|---------|
| Atrial fibrillation (18 SNPs)  | Grey matter volume (normalised)    | 0.898                      | 0.549                                            | IVW                  | -0.039 | 0.016          | 0.017   |
|                                |                                    |                            |                                                  | MR-Egger (bootstrap) | -0.045 | 0.031          | 0.075   |
|                                |                                    |                            |                                                  | Weighted median      | -0.044 | 0.022          | 0.047   |
|                                |                                    |                            |                                                  | MR-RAPS              | -0.042 | 0.017          | 0.014   |
|                                |                                    |                            |                                                  | MR-PRESSO            | NA     | NA             | NA      |
|                                | Grey matter volume (unnormalised)  | 0.942                      | 0.492                                            | IVW                  | -0.039 | 0.016          | 0.016   |
|                                |                                    |                            |                                                  | MR-Egger (bootstrap) | -0.051 | 0.032          | 0.047   |
|                                |                                    |                            |                                                  | Weighted median      | -0.047 | 0.023          | 0.042   |
|                                |                                    |                            |                                                  | MR-RAPS              | -0.042 | 0.017          | 0.013   |
|                                |                                    |                            |                                                  | MR-PRESSO            | NA     | NA             | NA      |
|                                | White matter volume (normalised)   | 0.639                      | 0.059                                            | IVW                  | -0.017 | 0.021          | 0.416   |
|                                |                                    |                            |                                                  | MR-Egger (bootstrap) | -0.035 | 0.033          | 0.159   |
|                                |                                    |                            |                                                  | Weighted median      | -0.030 | 0.023          | 0.197   |
|                                |                                    |                            |                                                  | MR-RAPS              | -0.015 | 0.021          | 0.472   |
|                                |                                    |                            |                                                  | MR-PRESSO            | NA     | NA             | NA      |
|                                | White matter volume (unnormalised) | 0.639                      | 0.076                                            | IVW                  | -0.017 | 0.020          | 0.404   |
|                                |                                    |                            |                                                  | MR-Egger (bootstrap) | -0.032 | 0.032          | 0.173   |
|                                |                                    |                            |                                                  | Weighted median      | -0.029 | 0.023          | 0.203   |
|                                |                                    |                            |                                                  | MR-RAPS              | -0.015 | 0.021          | 0.456   |
|                                |                                    |                            |                                                  | MR-PRESSO            | NA     | NA             | NA      |

MR = Mendelian randomization, IVW = Inverse variance weighted, RAPS = Robust Adjusted Profile Score, PRESSO = Pleiotropy ReSidual Sum and Outlier

MR-PRESSO analysis was performed, but the MR-PRESSO global test for heterogeneity did not identify correctable effects of outliers.

The unit of causal estimates were from a log odds ratio (atrial fibrillation) towards a standard deviation (brain volume).

**Supplemental Table 5.** Causal estimates from atrial fibrillation on brain grey or white matter volume of the UK Biobank participants by summary-level Mendelian randomization inferring strand information.

| Genetically predicted exposure | Outcome phenotype                  | MR-Egger intercept P value | Cochran's statistics Q P value for heterogeneity | MR method            | beta   | standard error | P value |
|--------------------------------|------------------------------------|----------------------------|--------------------------------------------------|----------------------|--------|----------------|---------|
| Atrial fibrillation (17 SNPs)  | Grey matter volume (normalised)    | 0.915                      | 0.478                                            | IVW                  | -0.039 | 0.017          | 0.019   |
|                                |                                    |                            |                                                  | MR-Egger (bootstrap) | -0.043 | 0.032          | 0.097   |
|                                |                                    |                            |                                                  | Weighted median      | -0.046 | 0.023          | 0.043   |
|                                |                                    |                            |                                                  | MR-RAPS              | -0.041 | 0.017          | 0.018   |
|                                |                                    |                            |                                                  | MR-PRESSO            | NA     | NA             | NA      |
|                                | Grey matter volume (unnormalised)  | 0.925                      | 0.423                                            | IVW                  | -0.039 | 0.017          | 0.021   |
|                                |                                    |                            |                                                  | MR-Egger (bootstrap) | -0.050 | 0.032          | 0.045   |
|                                |                                    |                            |                                                  | Weighted median      | -0.050 | 0.022          | 0.027   |
|                                |                                    |                            |                                                  | MR-RAPS              | -0.042 | 0.017          | 0.016   |
|                                |                                    |                            |                                                  | MR-PRESSO            | NA     | NA             | NA      |
|                                | White matter volume (normalised)   | 0.592                      | 0.045                                            | IVW                  | -0.015 | 0.022          | 0.493   |
|                                |                                    |                            |                                                  | MR-Egger (bootstrap) | -0.032 | 0.033          | 0.173   |
|                                |                                    |                            |                                                  | Weighted median      | -0.027 | 0.023          | 0.246   |
|                                |                                    |                            |                                                  | MR-RAPS              | -0.013 | 0.022          | 0.544   |
|                                |                                    |                            |                                                  | MR-PRESSO            | NA     | NA             | NA      |
|                                | White matter volume (unnormalised) | 0.594                      | 0.059                                            | IVW                  | -0.015 | 0.021          | 0.479   |
|                                |                                    |                            |                                                  | MR-Egger (bootstrap) | -0.031 | 0.033          | 0.173   |
|                                |                                    |                            |                                                  | Weighted median      | -0.027 | 0.024          | 0.246   |
|                                |                                    |                            |                                                  | MR-RAPS              | -0.014 | 0.021          | 0.525   |
|                                |                                    |                            |                                                  | MR-PRESSO            | NA     | NA             | NA      |

MR = Mendelian randomization, IVW = Inverse variance weighted, RAPS = Robust Adjusted Profile Score, PRESSO = Pleiotropy Residual Sum and Outlier

MR-PRESSO analysis was performed, but the MR-PRESSO global test for heterogeneity did not identify correctable effects of outliers.

The unit of causal estimates were from a log odds ratio (atrial fibrillation) towards a standard deviation (brain volume).
